# Supplementary material
Source: MDPI journal article supplement (https://www.mdpi.com/2673-964X/4/1/12)
Supplement: s1 [file s1]

### Supplementary Materials

**Supplementary Materials Figure S1.** Hindcast results of historical marsh migration and contemporaneous sea level rise using data provided in Supplementary Materials Table 3. Axes ordinates are shoreline location (x) and sea level elevation (y) 150 yrs before present (2020). Black line is landscape slope. Blue line is sea level elevation at present. Black dots indicate the distance of upslope horizontal migration of marsh over past 150 yrs. Distance between marsh migration location and intersection of landscape slope with sea level is the predicted gap between existing marsh and present shoreline.

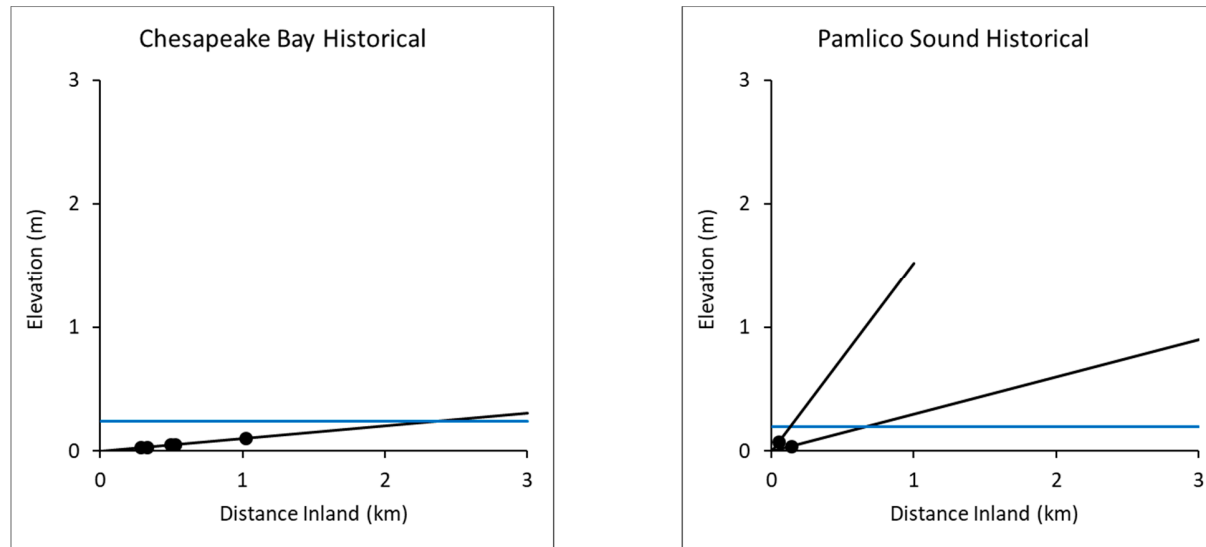

Parkinson, Randall W., 2024, Horizontal Rates of Wetland Migration Appear Unlikely to Keep Pace with Shoreline Transgression under Conditions of 21st Century Accelerating Sea Level Rise, Mid-Atlantic and Southeastern, U.S.A. Coasts.

**Supplementary Materials Table S1.** Slope values utilized in the investigation. All sources are USGS 7.5' topographic maps unless otherwise noted.

| Region of Focus   | Study area | Geographic location                | Land slope (m/km) | Source of slope value                       |
|-------------------|------------|------------------------------------|-------------------|---------------------------------------------|
| Delaware Bay      | 1A         | Cumberland & Cape May Counties, NJ | 0.8               | Heirlerville, NJ                            |
|                   | 1B         | Stow Creek, NJ                     | 0.3               | Canton, NJ                                  |
|                   | 1C         | Bombay Hook, DE                    | 0.3               | Bombay Hook, DE                             |
| Chesapeake Bay    | 2A1        | Hell Hook Marsh, MD                | 0.1               | Honga and Golden Hill, MD                   |
|                   | 2A2        | Cedar Creek Marsh, MD              | 0.1               | Blackwater River and Wingate, MD            |
|                   | 2B         | Goodwin Island, VA                 | 0.1               | Poquoson West, VA                           |
| Pamlico Sound     | 3A         | Long Shoal River, NC               | 0.3               | Engelhard NE and Long Shoal Point, NC       |
|                   | 3B1        | Cedar Island, NC                   | 1.5               | Atlantic, NC                                |
|                   | 3B2        | Long Bay, NC                       | 1.1               | Value defined by original authors           |
|                   | 3B3        | Nelson Bay, NC                     | 0.7               | Value defined by original authors           |
| South Florida     | 4A         | Southeast Saline Everglades, FL    | 0.1               | Biscayne Bay, Arsenicker, and Homestead, FL |
|                   |            | Southeast Saline Everglades, FL    | 0.1               | Biscayne Bay, Arsenicker, and Homestead, FL |
|                   | 4B         | Southeast Saline Everglades, FL    | 0.1               | Joe Bay and Palm Bay SE, FL                 |
|                   | 4C         | Ten Thousand Islands, FL           | 0.1               | Royal Pine Hammock and Belle Meade SE, FL   |
| Northwest Florida | 5          | Big Bend, FL                       | 0.4               | Value defined by original authors           |

Parkinson, Randall W., 2024, Horizontal Rates of Wetland Migration Appear Unlikely to Keep Pace with Shoreline Transgression under Conditions of 21st Century Accelerating Sea Level Rise, Mid-Atlantic and Southeastern, U.S.A. Coasts.

**Supplementary Materials Table S2.** Median sea level elevation, relative to 2020, and associated average rate of rise (2020 – 2050) corresponding to NOAA’s high scenario-based trajectory in 2050 [49].

| Area of Focus     | Station       | Elevation (m) |      |      | Average rate of rise (mm yr <sup>-1</sup> ) |           |
|-------------------|---------------|---------------|------|------|---------------------------------------------|-----------|
|                   |               | 2020          | 2050 | 2100 | 2020-2050                                   | 2050-2100 |
| Delaware Bay      | Cape May, NJ  | 0.15          | 0.55 | 2.12 | 13.2                                        | 31.4      |
| Chesapeake Bay    | Lewisetta, VA | 0.16          | 0.57 | 2.16 | 13.6                                        | 31.8      |
| Pamlico Sound     | Beaufort, NC  | 0.13          | 0.51 | 2.10 | 12.7                                        | 31.8      |
| South Florida     | Key West, FL  | 0.12          | 0.47 | 2.16 | 12.0                                        | 33.0      |
| Northwest Florida | Cedar Key, FL | 0.11          | 0.46 | 2.08 | 12.2                                        | 32.2      |

**Supplementary Materials Table S3.** Summary of data used to hindcast interaction of historical (i.e., extending back 150 yrs) rates of horizontal marsh migration and shoreline transgression organized by geographic location. Also shown are vertical sediment accumulation rates calculated using  $^{210}\text{Pb}$  and  $^{137}\text{Cs}$  radioisotope geochronologies and therefore representative of historical conditions. na = not applicable because historical horizontal marsh migration data was not identified.

| Region of focus   | Study area | Average rate of historical sea rise (mm yr <sup>-1</sup> ) <sup>a</sup> | Average rate (m yr <sup>-1</sup> ) of historical shoreline transgression <sup>b</sup> | Distance (m) of historical shoreline transgression <sup>c</sup> | Distance (m) of historical wetland migration <sup>d</sup> | Distance (m) between migrating wetland and transgressing shoreline <sup>d</sup> | Sediment accumulation rate (mm yr <sup>-1</sup> ) | Source |
|-------------------|------------|-------------------------------------------------------------------------|---------------------------------------------------------------------------------------|-----------------------------------------------------------------|-----------------------------------------------------------|---------------------------------------------------------------------------------|---------------------------------------------------|--------|
| Delaware Bay      | na         |                                                                         |                                                                                       |                                                                 |                                                           |                                                                                 | 2.8                                               | [52]   |
| Chesapeake Bay    | 2A1a       | 1.6                                                                     | 16                                                                                    | 2362                                                            | 525                                                       | 1837                                                                            | 2.2                                               | [28]   |
|                   | 2A1b       | 1.6                                                                     | 16                                                                                    | 2362                                                            | 330                                                       | 2032                                                                            |                                                   |        |
|                   | 2A2a       | 1.6                                                                     | 16                                                                                    | 2362                                                            | 1020                                                      | 1342                                                                            | 2.5                                               | [28]   |
|                   | 2A2b       | 1.6                                                                     | 16                                                                                    | 2362                                                            | 285                                                       | 2077                                                                            |                                                   |        |
|                   | 2B         | 1.6                                                                     | 16                                                                                    | 2362                                                            | 495                                                       | 1867                                                                            |                                                   |        |
| Pamlico Sound     | 3A         | 1.3                                                                     | 22                                                                                    | 650                                                             | 138                                                       | 512                                                                             |                                                   |        |
|                   |            |                                                                         |                                                                                       |                                                                 |                                                           |                                                                                 | 2.6                                               | [53]   |
|                   | 3B1        | 1.3                                                                     | 4                                                                                     | 128                                                             | 51                                                        | 77                                                                              |                                                   |        |
| South Florida     | na         |                                                                         |                                                                                       |                                                                 |                                                           |                                                                                 |                                                   |        |
| Northwest Florida | na         |                                                                         |                                                                                       |                                                                 |                                                           |                                                                                 |                                                   |        |

<sup>a</sup>Based upon historical sea level as reported in Table 1.

<sup>b</sup>Calculated using land slope (Table 2) and average rate of historical sea level rise.

<sup>c</sup>Calculated using average rate of historical rate of sea level rise and a time interval of 150 yrs (i.e., Chesapeake Bay 1850-2000 or 1872-2015, Pamlico Sound 1872-2015; Table 1).

<sup>d</sup>Calculated using rate of horizontal wetland migration (Table 1) and a time interval of 150 yrs.

Parkinson, Randall W., 2024, Horizontal Rates of Wetland Migration Appear Unlikely to Keep Pace with Shoreline Transgression under Conditions of 21st Century Accelerating Sea Level Rise, Mid-Atlantic and Southeastern, U.S.A. Coasts.

### **Supplementary Materials Reference List**

28. Hussein, A.H. Modeling of Sea-Level Rise and Deforestation in Submerging Coastal Ultisols of Chesapeake Bay. *Soil Science Society of America Journal* **2007**, 73, 185, doi:10.2136/sssaj2006.0436.
49. NOAA National Ocean Service 2022 Sea Level Rise Technical Report: Data and Tools Available online: <https://oceanservice.noaa.gov/hazards/sealevelrise/sealevelrise-data.html> (accessed on 11 December 2023).
52. Boyd, B.M.; Sommerfield, C.K. Marsh Accretion and Sediment Accumulation in a Managed Tidal Wetland Complex of Delaware Bay. *Ecological Engineering* **2016**, 92, 37–46, doi:10.1016/j.ecoleng.2016.03.045.
53. Corbett, D.R.; Vance, D.; Letrick, E.; Mallinson, D.; Culver, S. Decadal-Scale Sediment Dynamics and Environmental Change in the Albemarle Estuarine System, North Carolina. *Estuarine, Coastal and Shelf Science* **2007**, 71, 717–729, doi:10.1016/j.ecss.2006.09.024.
